# Supplementary material
Source: Springer Nature journal article supplement (https://www.springermedizin.de/resource/supplementary/13054_2011_9882_MOESM1_ESM.pdf/9707172)

### a) ALI

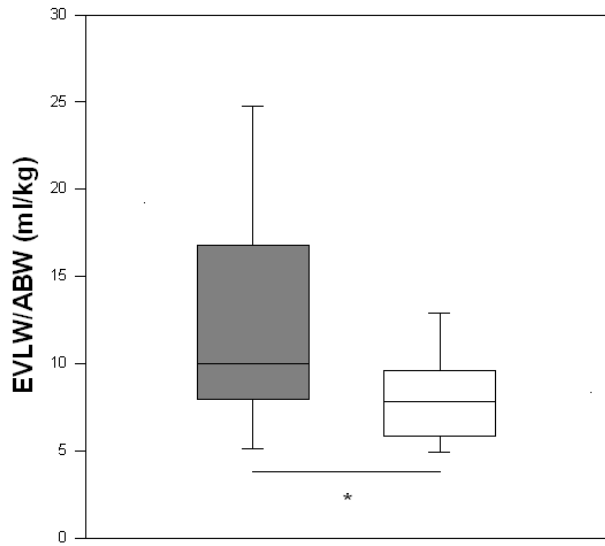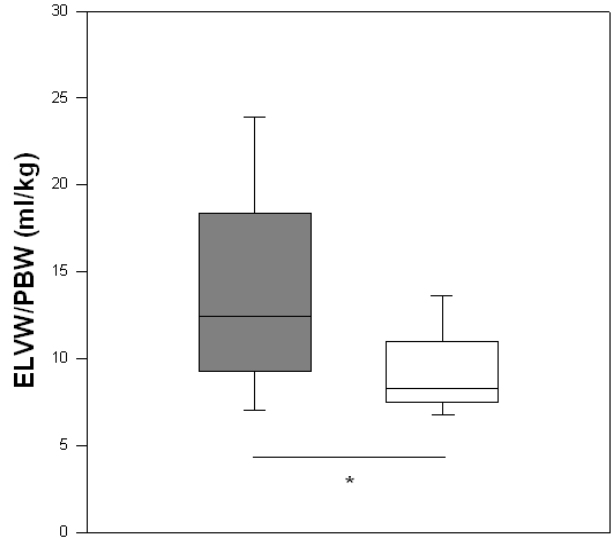

### b) ARDS

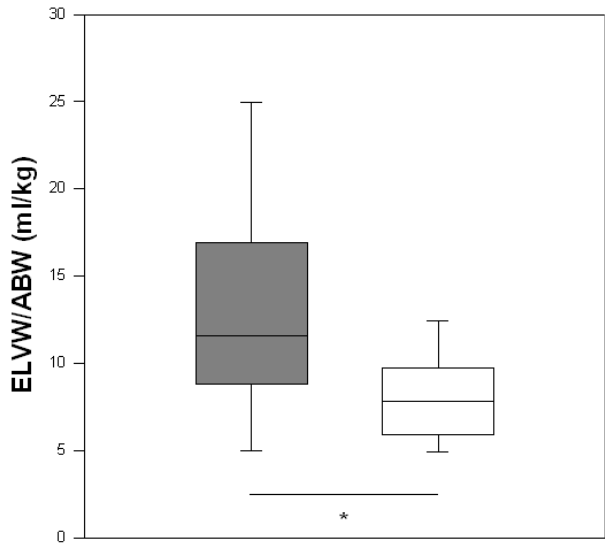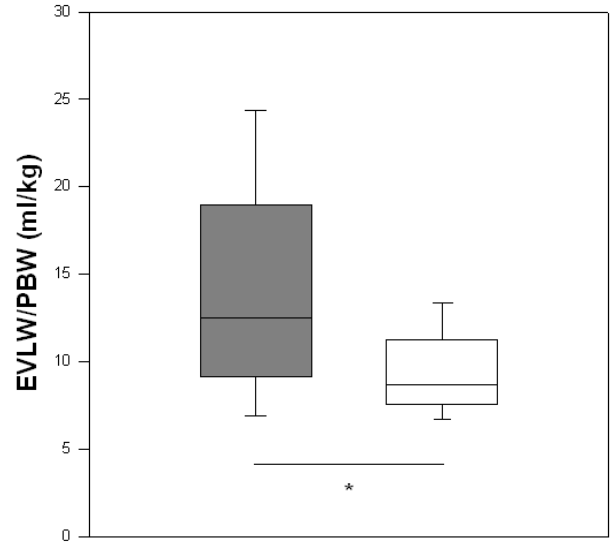

Supplement: MOESM1 [file 9707172]
